# Supplementary material for: Early Diagnosis of Chemotherapy-Linked Cardiotoxicity in Breast Cancer Patients Using Conventional Biomarker Panel: A Prospective Study Protocol
Source: MDPI journal article supplement (doi:10.3390/diagnostics12112714), 2022-11-06
Supplement: s1 [file s1]

## INDIVIDUAL REGISTRATION CARD (IRC)

Appendix No. 5

STUDY "DEVELOPMENT OF A PROGRAM FOR EARLY DIAGNOSTICS AND TREATMENT OF  
CARDIOTOXIC COMPLICATIONS CAUSED BY CHEMOTHERAPY OF BREAST CANCER"

RESEARCHER \_\_\_\_\_ Recruitment date \_\_\_\_\_

Patient's code \_\_\_\_\_ Indiv. identification number \_\_\_\_\_

Phone \_\_\_\_\_

Address \_\_\_\_\_

### Inclusion Criteria:

Age 18 years and older;

Outpatient or inpatient treatment at the University's Medical Center with a verified diagnosis of breast cancer of any stage;

Administration of targeted therapy in case of confirmed Her2 positive status and/or drugs from the Anthracycline group.

### Exclusion Criteria:

A history of the cardiotoxic effect of chemotherapy, regardless of the statute of limitations;

Progression of coronary artery disease or decompensation of CHF in the previous 6 months;

Simpson left ventricular ejection fraction  $\leq 40\%$ ;

Decompensation of comorbid pathology (endocrine disorders, diseases of the liver, kidneys, bronchopulmonary system) in the previous 3 months.

### GENERAL INFORMATION:

Name \_\_\_\_\_

Date of Birth: \_\_\_\_\_ Age \_\_\_\_\_ Gender \_\_\_\_\_

**Ethnicity:** Asian - 1; European - 2; I refuse to answer - 3.

**Marital status:** Single/Not married – 1; Married – 2; Divorced -3; Widow/widower – 4;

I refuse to answer – 5.

### Occupation (main occupation for the last 12 months):

State employee -1; Private sector employee -2; Entrepreneur - 3; Student - 4; Housewife - 5; Retired - 6;

Unemployed (able to work) - 7; Disabled - 8; Refuse to answer - 9.

Height \_\_\_\_\_ (cm); Weight \_\_\_\_\_ (kg); BMI \_\_\_\_\_ ( $\text{kg}/\text{m}^2$ )

### I.BREAST CANCER FEATURES

**Hereditary factor:** Yes - 1; No - 2; **Menopause:** Yes - 1; No - 2; **BC localization:** Right - 1; Left – 2;

**Clinical staging:** 1 – I St; 2 – IIA St; 3 – IIB St; 4 – IIIA St; 5 – IIIB St; 6 - IV St.

**Tumor histotype:**

- 1 - invasive carcinoma without specification;
- 2 - intraductal cancer;
- 3 - infiltrating ductal cancer;
- 4 - lobular cancer;
- 5 - carcinosarcoma.

**Clinical classification of the tumor:**

- 1 - nodal cancer
- 2 - diffuse form - mastitis-like cancer
- 3 - diffuse form - edematous-infiltrative cancer
- 4 - diffuse form - Paget's cancer
- 5 - diffuse form - shell cancer
- 6 - diffuse form - erysipelalous cancer
- 7 - diffuse form - others, without specification.

**Immunohistochemical data:**

- 1 – Triple negative TNBC ( ER (-), PR (-), Her-2-neu – neg, Ki 67 – any);
- 2 – Luminal type A ( ER (+) and/or PR (+), Her-2-neu – neg., Ki 67 – < 20%);
- 3 – Luminal B type (positive) (ER (+) and/or PR (+), Her-2-neu – pos., Ki 67 – any);
- 4 – Luminal B type (negative) тип (ER (+) and/or PR (+), Her-2-neu – neg., Ki 67 – > 20%);
- 5 – Her-2-positive type (ER (-), PR (-), Her-2-neu – pos., Ki 67 – any).

**II.VISITS**

| Factors                                             | Visit 0 | Visit 1 | Visit 2 | Visit 3 | Visit 4 |
|-----------------------------------------------------|---------|---------|---------|---------|---------|
| Smoking, yes-1, no-2                                |         |         |         |         |         |
| Physical activity (hour, min)                       |         |         |         |         |         |
| SBP                                                 |         |         |         |         |         |
| DBP                                                 |         |         |         |         |         |
| Heart rate, beats/min                               |         |         |         |         |         |
| Hemoglobin, g/l                                     |         |         |         |         |         |
| Leukocytes, 10 <sup>9</sup>                         |         |         |         |         |         |
| Platelets, 10 <sup>9</sup>                          |         |         |         |         |         |
| Blood glucose, mmol/l                               |         |         |         |         |         |
| Creatinine, mmol/l                                  |         |         |         |         |         |
| Bilirubin, mmol/l                                   |         |         |         |         |         |
| Total cholesterol, mol/l                            |         |         |         |         |         |
| Arterial hypertension, yes-1, no - 2                |         |         |         |         |         |
| Diabetes mellitus, yes-1, no - 2                    |         |         |         |         |         |
| IHD (functional class I,II,III,IV)                  |         |         |         |         |         |
| CHF (functional class I,II,III,IV)                  |         |         |         |         |         |
| History of stroke                                   |         |         |         |         |         |
| CHARLSON, scores                                    |         |         |         |         |         |
| 6-minute walk test, meters                          |         |         |         |         |         |
| 6-minute walk test,<br>functional class I,II,III,IV |         |         |         |         |         |
| <b>Cardiac protectors</b>                           |         |         |         |         |         |
| 1ACE inhibitor/ARA blockers                         |         |         |         |         |         |
| 2Beta-blockers                                      |         |         |         |         |         |

|                                                  |  |  |  |  |  |
|--------------------------------------------------|--|--|--|--|--|
| 3Calcium channel blockers                        |  |  |  |  |  |
| 4Statins                                         |  |  |  |  |  |
| 5Trimetazidine and analogues                     |  |  |  |  |  |
| 6 Other (write in)                               |  |  |  |  |  |
| 7Other (write in)                                |  |  |  |  |  |
| <b>BC treatment</b>                              |  |  |  |  |  |
| Doxorubicin, dose/regimen                        |  |  |  |  |  |
| Trastuzumab, dose/regimen                        |  |  |  |  |  |
| Radiation therapy, dose/regimen                  |  |  |  |  |  |
| Surgical treatment:<br>Radical -1;<br>Sectoral-2 |  |  |  |  |  |
| <b>Biomarkers</b>                                |  |  |  |  |  |
| cTn, ng/mL                                       |  |  |  |  |  |
| BNP, pg/mL                                       |  |  |  |  |  |
| CRP, mg/L                                        |  |  |  |  |  |
| D dimer, mg/L                                    |  |  |  |  |  |
| MPO, U/ml                                        |  |  |  |  |  |
| Gal-3, ng/ml                                     |  |  |  |  |  |
| <b>ECG, HM, EchoCG</b>                           |  |  |  |  |  |
| ECG, code                                        |  |  |  |  |  |
| Holter monitoring*, code                         |  |  |  |  |  |
| LVEF (Simpson), %                                |  |  |  |  |  |
| GLS, %                                           |  |  |  |  |  |
| Cardiotoxicity type, code                        |  |  |  |  |  |
| * - 0,2,4 visits                                 |  |  |  |  |  |

### CHARLSON Comorbidity index

| DISEASES                            | SCORES |
|-------------------------------------|--------|
| Myocardial infarction               | 1      |
| Chronic heart failure               | 1      |
| Peripheral artery disease           | 1      |
| Cerebrovascular disease             | 1      |
| Dementia                            | 1      |
| Chronic lung disease                | 1      |
| Connective tissue disease           | 1      |
| Peptic ulcer                        | 1      |
| Mild liver damage                   | 1      |
| Diabetes                            | 1      |
| Hemiplegia                          | 2      |
| Moderate or severe kidney disease   | 2      |
| Diabetes mellitus with organ damage | 2      |
| Malignant tumor without metastases  | 2      |
| Leukemia                            | 2      |
| Lymphomas                           | 2      |
| Moderate or severe liver damage     | 3      |
| Metastatic malignant tumors         | 6      |
| AIDS (disease, not viremia)         | 6      |

|                                           |                                                                                                                     |
|-------------------------------------------|---------------------------------------------------------------------------------------------------------------------|
| Age                                       | 40-49 years old - 1 score; 50-59 years old - 2 scores; 60-69 years old - 3 scores; 70-79 years old - 4 scores, etc. |
| <b>CHARLSON comorbidity index, scores</b> |                                                                                                                     |

### 6-minute walk test

| Parameter                        | initially | After test |
|----------------------------------|-----------|------------|
| Shortness of breath (Borg scale) |           |            |
| Weakness (Borg scale)            |           |            |
| Heart rate                       |           |            |
| Arterial BP                      |           |            |

Pauses or stops during the test: yes / no; time \_\_\_\_\_ amount \_\_\_\_\_

Symptoms during the test: angina pectoris \_\_\_\_\_ dizziness \_\_\_\_\_

leg pain \_\_\_\_\_ weakness \_\_\_\_\_ other \_\_\_\_\_

Number of laps \_\_\_\_\_ Distance covered \_\_\_\_\_

### FC score NYHA

| The severity of CHF (NYHA) | Distance 6-minute walk |
|----------------------------|------------------------|
| I FC                       | 426-550                |
| II FC                      | 301-425                |
| III FC                     | 151-300                |
| IV FC                      | <150                   |

### Complications of Chemotherapy

| Factors (code)                             | Visit 0 | Visit 1 | Visit 2 | Visit 3 | Visit 4 |
|--------------------------------------------|---------|---------|---------|---------|---------|
| 1 Cardiotoxic (code)                       |         |         |         |         |         |
| 2 Hematopoietic system                     |         |         |         |         |         |
| 3 Thromboembolic complications             |         |         |         |         |         |
| 4 Pericarditis                             |         |         |         |         |         |
| 5 Gastrointestinal tract                   |         |         |         |         |         |
| 6 Respiratory system                       |         |         |         |         |         |
| 7 Urinary system                           |         |         |         |         |         |
| 8 Allergic reactions                       |         |         |         |         |         |
| 9 Neurotoxicity                            |         |         |         |         |         |
| 10 Toxic effect on the skin and appendages |         |         |         |         |         |
| 11 Toxic hyperthermic reactions            |         |         |         |         |         |
| 12 Toxic phlebitis                         |         |         |         |         |         |

### Chemotherapy outcomes

| Factors (code)                                 | Visit 0 | Visit 1 | Visit 2 | Visit 3 | Visit 4 |
|------------------------------------------------|---------|---------|---------|---------|---------|
| 1 According to the plan, without complications |         |         |         |         |         |
| 2 ChT correction due to CT                     |         |         |         |         |         |

|                                                |  |  |  |  |  |
|------------------------------------------------|--|--|--|--|--|
| complications                                  |  |  |  |  |  |
| 3 ChT suspension due to CT complications       |  |  |  |  |  |
| 4 Correction of CT due to non-CT complications |  |  |  |  |  |
| 5 ChT suspension due to non-CT complications   |  |  |  |  |  |
| 6 Completion of chemotherapy, %                |  |  |  |  |  |
| 7 Death (date, cause)                          |  |  |  |  |  |
| 8 Dropped out of the study                     |  |  |  |  |  |

### Codes for ECG and Holter monitoring

#### ECG codes

- 1 - Norm;
- 2 - Sinus tachycardia (HR> 90 beats / min);
- 3 - Sinus bradycardia (HR<60 bpm);
- 4 - Atrial extrasystoles;
- 5 - Ventricular extrasystoles;
- 6 - Atrial fibrillation
- 7 - AVB I st, AVB II st Mobitz 1;
- 8 - AVB II st Mobitz 2, AVB III st;
- 9 - Bundle branch block;
- 10- ST segment depression/elevation;
- 11- Prolongation of QT corrected.

#### HMECG codes

- 1-Norm;
- 2-Atrial extrasystoles single, paired;
- 3-Atrial extrasystoles group, paroxysms of atrial tachycardia;
- 4-Ventricular extrasystoles Laun I, II, III;
- 5- Ventricular extrasystoles Laun IV, V;
- 6-Atrial fibrillation;
- 7-AVB Ist, AVB II st Mobitz 1;
- 8-AVB II st Mobitz 2, AVB IIIst;
- 9- Bundle branch block;
- 10-ST segment depression/elevation;
- 11- Corrected QT prolongation.

### Complications of Chemotherapy (codes)

#### Cardiotoxic (codes):

- 1-Subclinical LV dysfunction;
- 2-Clinical LV dysfunction;
- 3-Rhythm and conduction disorders;
- 4-Arterial hypertension
- 5-Angina pectoris;
- 6-Pulmonary hypertension;
- 7-Pericarditis;
- 8-Thrombosis and thromboembolism;
- 9-Peripheral vascular disease and stroke

#### Type of cardiotoxicity:

- A-Acute;
- B-Subacute;
- C-Chronic

#### Hematopoietic system:

- 1 - Anemia
- 2 - Thrombocytopenia
- 3 - Leukopenia

Note\_\_\_\_\_

#### Gastrointestinal tract

- 1- Nausea and vomiting
- 2 - Stomatitis/mucositis
- 3 - Toxic enterocolitis
- 4 - Toxic hepatitis

#### Respiratory system

- 1-Acute respiratory failure
- 2-Bronchospasm
- 3-Pneumonitis, bronchitis
- 4-Pulmonary edema

Note\_\_\_\_\_

#### Urinary system

- 1-Nephrotoxicity
- 2-Toxic cystitis

Note\_\_\_\_\_

#### Allergic reactions

- 1-Anaphylactic shock
- 2-Urticaria

3-Bronchospasm

Note\_\_\_\_\_

**Neurotoxicity**

1-Peripheral

2-Central

3- Psychovegetative disorders

Note\_\_\_\_\_

## CARDIOVASCULAR RISK STRATIFICATION FOR UPCOMING CHEMOTHERAPY TREATMENT

**Appendix No. 6**

Study "DEVELOPMENT OF A PROGRAM FOR EARLY DIAGNOSIS AND TREATMENT OF  
CARDIOTOXIC COMPLICATIONS CAUSED BY BREAST CANCER CHEMOTHERAPY"  
(PREDICATE)

PATIENTS' CODE \_\_\_\_\_ DATE OF FILLING IN \_\_\_\_\_

| RISK FACTOR                                                                                                                                                                                                                                                                                                                                                      | HAZARD LEVEL OF THE RISK FACTOR | PATIENT'S RISK LEVEL |
|------------------------------------------------------------------------------------------------------------------------------------------------------------------------------------------------------------------------------------------------------------------------------------------------------------------------------------------------------------------|---------------------------------|----------------------|
| Existing chronic heart failure or dilated cardiomyopathy                                                                                                                                                                                                                                                                                                         | Very high                       |                      |
| Previous severe valvular heart disease                                                                                                                                                                                                                                                                                                                           | High                            |                      |
| Past myocardial infarction and/or revascularization                                                                                                                                                                                                                                                                                                              | High                            |                      |
| Stable angina                                                                                                                                                                                                                                                                                                                                                    | High                            |                      |
| Baseline left ventricular ejection fraction <50%                                                                                                                                                                                                                                                                                                                 | High                            |                      |
| Initial left ventricular ejection fraction 50-54%                                                                                                                                                                                                                                                                                                                | Intermediate                    |                      |
| Elevated Troponin at baseline                                                                                                                                                                                                                                                                                                                                    | Intermediate                    |                      |
| Initially elevated NT-proBNP or BNP                                                                                                                                                                                                                                                                                                                              | Intermediate                    |                      |
| Age over 80                                                                                                                                                                                                                                                                                                                                                      | High                            |                      |
| Age 65-79 years                                                                                                                                                                                                                                                                                                                                                  | Intermediate                    |                      |
| Arterial hypertension                                                                                                                                                                                                                                                                                                                                            | Intermediate                    |                      |
| Diabetes mellitus                                                                                                                                                                                                                                                                                                                                                | Intermediate                    |                      |
| Chronic kidney disease                                                                                                                                                                                                                                                                                                                                           | Intermediate                    |                      |
| Prior treatment with Anthracyclines                                                                                                                                                                                                                                                                                                                              | High                            |                      |
| Prior Radiation Therapy                                                                                                                                                                                                                                                                                                                                          | High                            |                      |
| Prior anticancer therapy without Anthracyclines                                                                                                                                                                                                                                                                                                                  | Intermediate                    |                      |
| Long history of smoking                                                                                                                                                                                                                                                                                                                                          | Intermediate                    |                      |
| Obesity with body mass index >30 kg/m <sup>2</sup>                                                                                                                                                                                                                                                                                                               | Intermediate                    |                      |
| <b>TOTAL RISK OF CARDIOTOXIC COMPLICATIONS</b>                                                                                                                                                                                                                                                                                                                   |                                 |                      |
| <p><b>*Note:</b><br/>           Low risk of cardiotoxicity (CT) - 1 intermediate risk factor (RF) or no RF;<br/>           Intermediate risk of CT - from 2 to 4 intermediate risk factors;<br/>           High risk CT - more than 5 intermediate risk factors or 1 high risk factor;<br/>           Very high risk CT - presence of very high risk factor.</p> |                                 |                      |
